# Supplementary material
Source: PubMed Central journal article supplement (PMC7121626)
Supplement: NEJMc2001737_appendix.pdf [file NEJMc2001737_appendix.pdf]

## Supplementary Appendix

This appendix has been provided by the authors to give readers additional information about their work.

Supplement to: Zou L, Ruan F, Huang M, et al. SARS-CoV-2 viral load in upper respiratory specimens of infected patients. *N Engl J Med* 2020;382:1177-9. DOI: [10.1056/NEJMc2001737](https://doi.org/10.1056/NEJMc2001737)

**Table of Contents**

**Supplementary Table 1.**

**Supplementary Table 1. Demographics and clinical symptoms of imported and secondary patients infected with SARS-CoV-2.**

| Patient ID      | Gender | Age (years) | Date of symptom onset | Clinical symptoms                                  |
|-----------------|--------|-------------|-----------------------|----------------------------------------------------|
| Imported cases  |        |             |                       |                                                    |
| B               | M      | 44          | 24 January 2020       | Low fever, diarrhoea                               |
| C               | M      | 56          | 19 January 2020       | Fever, nausea, palpation                           |
| E*              | M      | 36          | 17 January 2020       | Fever, weakness, myalgia, cough, haemoptysis       |
| F               | M      | 69          | 20 January 2020       | Fever, shortness of breath                         |
| I*              | M      | 78          | 11 January 2020       | Weakness, cough, nasal discharge, myalgia          |
| K               | F      | 66          | 13 January 2020       | Cough                                              |
| N               | F      | 50          | 11 January 2020       | Fever, chest distress                              |
| O               | F      | 28          | 26 January 2020       | Cough                                              |
| P*              | F      | 76          | 11 January 2020       | Headache, weakness, dry cough                      |
| Q               | F      | 70          | 20 January 2020       | Fever, poor appetite, shortness of breath          |
| S               | M      | 65          | 7 January 2020        | Cough                                              |
| T               | F      | 58          | 24 January 2020       | Fever, dry cough                                   |
| W               | M      | 60          | 23 January 2020       | Low fever, cough                                   |
| X               | M      | 60          | 20 January 2020       | Fever, dry cough, shortness of breath, haemoptysis |
| Secondary cases |        |             |                       |                                                    |
| D               | F      | 60          | 22 January, 2020      | Headache                                           |
| H               | F      | 49          | 17 January, 2020      | Fever                                              |
| L               | F      | 38          | 20 January, 2020      | Cough                                              |
| Z               | M      | 26          | not applicable        | No symptom                                         |

\* Severe cases admitted to intensive care units.
